# Supplementary material for: Inclusion unlocks the creative potential of gender diversity in teams
Source: Research Square preprint supplement (doi:10.21203/rs.3.rs-2713291/v1), 2023-03-28
Supplement: Supplementary file 1 [file ceb384c4c94b1485a53d896f.docx]

# Supplementary Information

Inclusion unlocks the creative potential of gender diversity in teams

Balázs Vedres, Orsolya Vásárhelyi

**Content**

**Supplementary Text**

**Figs. S1 to S5**

**Tables S1 to S12**

**Data S1**

**Code S1**

***Accuracy of Gender Inferring***

To quantify the error in our algorithm we randomly selected 200-200 team members whose gender was inferred as male, female and unknown and manually inferred their gender. Since these people re professionals, we look-up their profiles on LinkedIn and labelled them based on their pictures, bio, and recommendations (if the text used gendered language aka, He or She). If we could not find any LinkedIn user with the same name or based on the picture or the text it was not possible to decide whether the given individual is a male or female, we labelled them as unknown.

Furthermore, we ran another widely used gender inferring method on our database gender-guesser (<https://pypi.org/project/gender-guesser/>) to compare how well our method performed. Figure S1. shows the accuracy of the used gender inferring method and the Gender Guesser Python package in comparison with the manually created baseline. Precision measures how many contributors were assigned to the correct gender label according to our baseline. Recall measures how many of the contributors were correctly identified. F-score takes the harmonic average of these two metrics. Our method has a higher precision for females and males, but lower recall for male. Table S3. Shows that our method is also better identifying unknowns than the Gender-Guesser default python package, but worse in identifying male contributors.

**Impact of Gender Robustness on Modelling**

To account for the potential bias that inferred gender could introduce to results, we adopt various robustness checks. Although the precision of our name-based gender inferring method was nearly perfect for men and women, we accounted much lower precision for unknowns (50%). Although we excluded teams with more than 50% of unknowns from our analysis, there is still bias that team members with unknown gender can add to our results. Statistics on female representation in the video game industry indicate that most of the unknowns are more likely to be male. Therefore, we randomly select 25 or 50 percent of unknown gendered team members in each game and re-label them as males and re-calculate all diversity and inclusion metrics. We repeat this process 100 times and take the average of the resulting inclusion metrics for each game. (Figure S3, in SI shows the distribution of newly calculated gender diversity and inclusion metrics with 25 and 50 percent of relabeled data compared to original data). Then we rerun game-level OLS models to predict games’ distinctiveness based on the 25 and 50 percent relabeled diversity and inclusion metrics. The interaction between gender diversity and bonding stays significant even if 50 percent of unknown gendered team members are labelled as males. Similarly, to bonding, combined inclusion’s interaction with gender diversity is robust to gender relabeling, while mixing and incorporating lose their significance if at least 25 percent of unknowns turn out to be male. (See the Distribution of gender swapped diversity and inclusion metrics at Figure S4 and Point estimates of distinctiveness based on OLS models ran on relabelled gender data at Figure S5)

Figure S1.


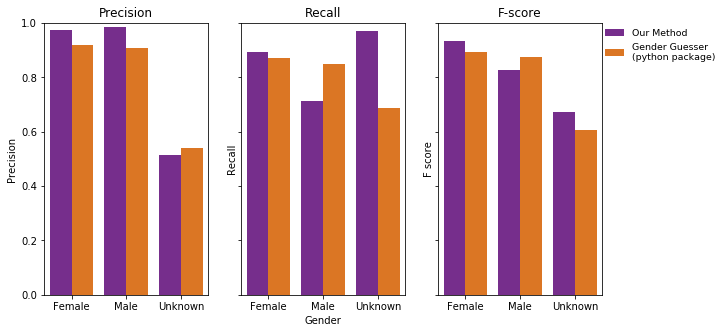


**Gender Inferring Accuracy.** Precision, Recall and F-score of our gender inferring method and the Gender Guesser Python package in comparison with the manually created baseline. Precision measures how many contributors were assigned to the correct gender label according to our manually created baseline. Recall measures how many of the contributors were correctly identified. F-score takes the harmonic average of these two metrics

Figure S2.

**Point estimates of distinctiveness in four model specifications.** Point estimates of distinctiveness with 95% CI for gender diversity, four variables of inclusion, and their interactions with gender diversity. Markers are numbered according to OLS models; coefficients are for one SD change in distinctiveness because of one SD change in independent variables. Panel a) shows the point estimates of different inclusion models based on the baseline game-level OLS models shown in the manuscript. Panel b) shows estimates for game-level OLS models with Random Effects for firms to estimate the effect of game specific characteristics and Panel c) with Fixed-Effects for firms to account for firm-level specific effects. Point estimates from models visualized in Panel d) are coming from firm-level aggregated data, where each variable is the average of all games produced by a given firm.

Figure S3.


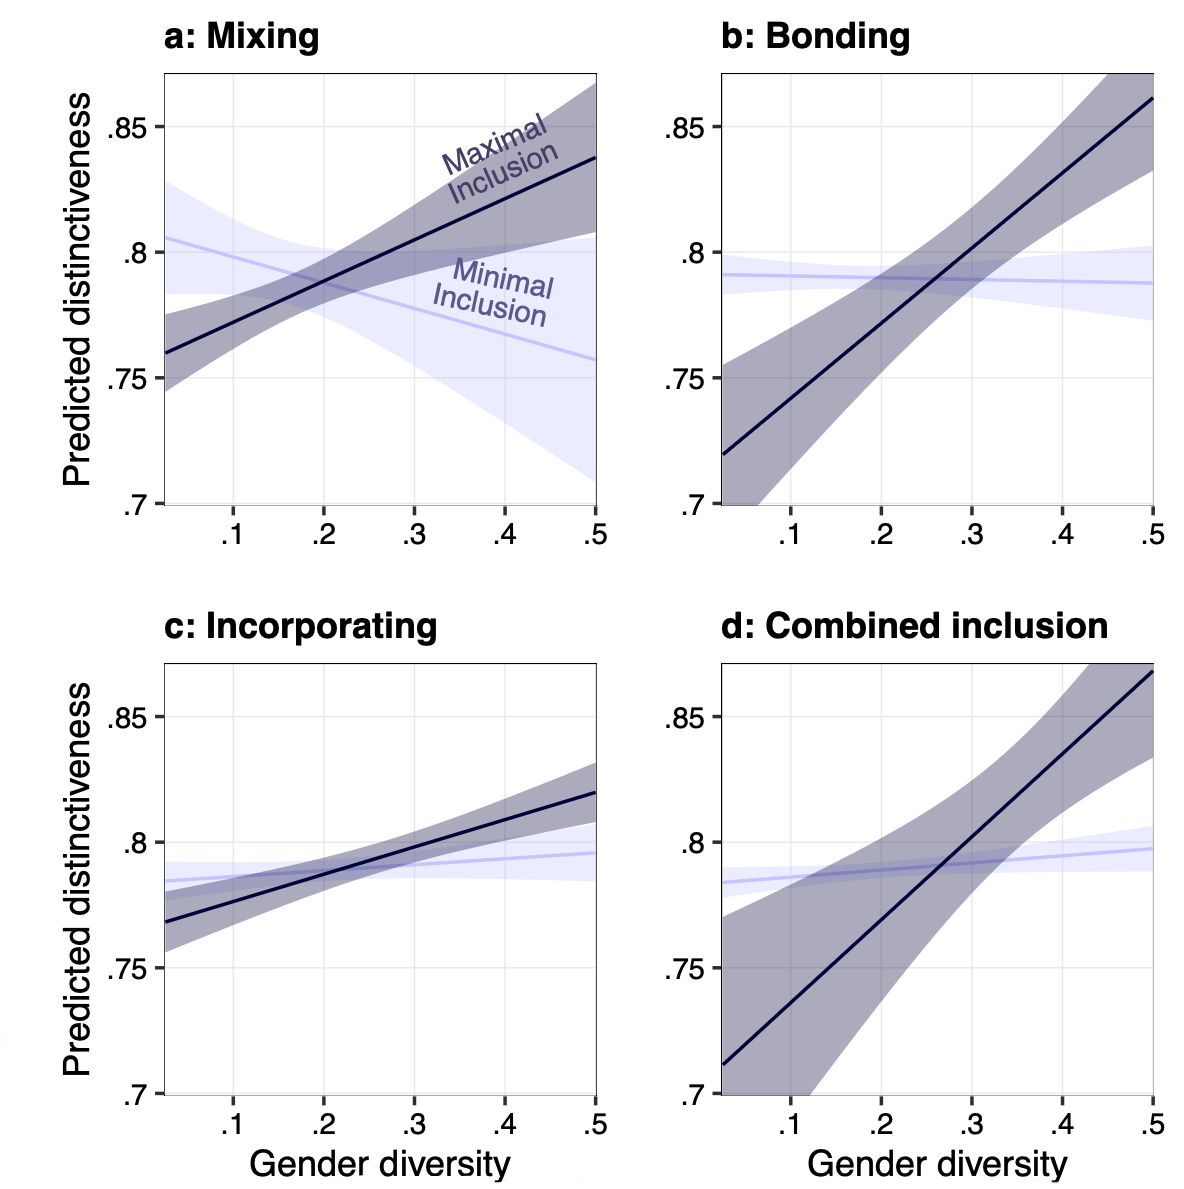


**Marginal predictions for all four inclusion variables** Game level OLS models’ predicted distinctiveness by by gender diversity at minimal and maximal levels of mixing inclusion with 95% CI, keeping all controls at their means.

Figure S4.

**Distribution of gender swapped diversity and inclusion metrics.** To assess the bias that name-based gender inferring method can introduce to our independent variables we randomly re-labelled 25 and 50 percent of unknown gendered team members to male in each game, and calculated Gender Diversity, Mixing, Bonding, Incorporating and Combined Inclusion. We repeated this process 100 times for each game and calculated the average of the resulting diversity and inclusion metrics. Blue histogram shows the original distribution, orange distribution is based on 25 percent re-labelled data, and green is based on 50 percent. Distributions indicate that Mixing and Incorporating are more sensitive to re-labelling than Bonding and the Combined Index.

Figure S5.

**Point estimates of distinctiveness based on OLS models ran on relabelled gender data.** To assess the impact of unknowns in project teams, we re-calculated our diversity and inclusion metrics 100 times by randomly relabelling 25 and 50 of unknown gendered team members to male. Blue indicates original point estimates of distinctiveness with 95% CI for gender diversity, yellow 25 percent of unknowns relabelled to male, and green 50.

Table S1.

| Number of games | 8,617 |
| --- | --- |
| Years | 1993-2009 |
| Number of developers | 630,420 |
| Women | 119,826 (19%) |
| Men | 397,520 (63%) |
| Unknowns | 113,074 (18%) |

**Descriptive Statistics of original data collected from mobygames.com** We collected data from the video game industry, relying on MobyGames.com. Our dataset contains 8,617 unique video games, with a list of each game’s developer teams, critic’s reviews, and stylistic elements such as genres, perspective (e.g., first-person shooter, role-playing) and the platforms it can be played on (e.g., PlayStation, Nintendo Switch, etc.). We also record each game’s developer studio, publishing house, and the year of the first release.

Table S2.

| **Filtering Criteria** | **N** |
| --- | --- |
| All games | 8,617 |
| Published between 1993 and 2009 | 7,931 |
| 1<number of edges in the network <2000 | 4,771 |
| Ratio of unknowns in team < 0.5 | 4,654 |
| Number of women in team network >=1 | **4,011** |

**Applied filtering criteria on our game dataset.** For our analysis we only considered games which were published between 1993 and 2009, and had less than 2000 connection among team members, had at least one female team member, and less than 50% of team members gender could have been inferred. We excluded all re-released and mobile games. Since gender diversity is a key interest of our study, we had to exclude all those video games from our analysis which did not list team members’ full name and used only initials instead of first names. Our resulting database contains 4,011 video games.

Table S3.

| **Gender Guesser** | **Female** | **Male** | **Unknown** |
| --- | --- | --- | --- |
| **Our Method** |  |  |  |
| **Female** | 0.895 | 0.04 | 0.065 |
| **Male** | 0.005 | 0.96 | 0.035 |
| **Unknown** | 0.135 | 0.29 | 0.575 |

**Ratio of matching gender categories by Our method and Gender-Guesser.** Female contributors matched in 89.5%, and male contributors 96% of our sample.

Table S4.

|  | Distinctiveness | | | |
| --- | --- | --- | --- | --- |
|  | *OLS Models* | | | |
|  | Std rob SE | Dev firm RE | Dev firm FE dummies | Dev firm level std |
|  | (1) | (2) | (3) | (4) |
| Diversity | 0.040* | 0.033 | 0.032 | 0.043 |
|  | (0.021) | (0.022) | (0.025) | (0.038) |
| Combined Inclusion | -0.115** | -0.137** | -0.136** | -0.173* |
|  | (0.051) | (0.054) | (0.061) | (0.097) |
| Diversity: Combined Inclusion | 0.048*** | 0.049*** | 0.032* | 0.073*** |
|  | (0.016) | (0.017) | (0.019) | (0.028) |
| Team Size | -0.001*** | -0.001*** | -0.001*** | -0.001** |
|  | (0.0002) | (0.0002) | (0.0003) | (0.0004) |
| Newbies ratio | 0.158 | 0.149 | 0.179 | 0.082 |
|  | (0.115) | (0.114) | (0.134) | (0.238) |
| Games tenure | 0.038* | 0.009 | 0.008 | 0.025 |
|  | (0.023) | (0.024) | (0.033) | (0.044) |
| Star developer | 0.135 | 0.305 | 0.340 | -0.349 |
|  | (0.310) | (0.382) | (0.306) | (0.239) |
| Single-firm production | 0.050 | 0.006 | -0.003 | -0.021 |
|  | (0.034) | (0.038) | (0.052) | (0.069) |
| Ratio of core | 0.200** | 0.210** | 0.230** | 0.384 |
|  | (0.100) | (0.096) | (0.114) | (0.235) |
| Number of countries | -0.033*** | -0.029*** | -0.024*** | -0.040*** |
|  | (0.006) | (0.005) | (0.007) | (0.014) |
| N | 4,011 | 4,011 | 3,368 | 1,354 |
| R2 | 0.112 | 0.225 | 0.475 | 0.165 |
| Adjusted R2 | 0.105 | 0.219 | 0.327 | 0.146 |
| *Note:* | *p<0.1; **p<0.05; ***p<0.0 | | | |

Predicting Creativity with Mixing. Table shows key variables and main controls (except year and platform dummies). Model 1) Baseline Model with standardized variables Model 2) Developer firms Random-Effects 3) Developer firms with Fixed-effects (as dummies) 4) Developer firm level aggregated models

**Table S5.**

|  | Distinctiveness | | | |
| --- | --- | --- | --- | --- |
|  | *OLS Models* | | | |
|  | Std rob SE | Dev firm RE | Dev firm FE dummies | Dev firm level std |
|  | (1) | (2) | (3) | (4) |
| Diversity | -0.010 | -0.004 | 0.049 | -0.092 |
|  | (0.032) | (0.031) | (0.039) | (0.058) |
| Bonding | -0.134*** | -0.134*** | -0.103** | -0.172** |
|  | (0.040) | (0.041) | (0.048) | (0.071) |
| Diversity: Bonding | 0.057*** | 0.051*** | 0.018 | 0.094*** |
|  | (0.015) | (0.015) | (0.017) | (0.024) |
| Team Size | -0.001*** | -0.001*** | -0.001*** | -0.001** |
|  | (0.0002) | (0.0002) | (0.0003) | (0.0004) |
| Newbies ratio | 0.169 | 0.154 | 0.176 | 0.087 |
|  | (0.115) | (0.113) | (0.133) | (0.237) |
| Games tenure | 0.038* | 0.009 | 0.012 | 0.027 |
|  | (0.023) | (0.024) | (0.033) | (0.043) |
| Star developer | 0.146 | 0.307 | 0.327 | -0.327 |
|  | (0.307) | (0.386) | (0.305) | (0.229) |
| Single-firm production | 0.050 | 0.005 | -0.005 | -0.029 |
|  | (0.034) | (0.038) | (0.052) | (0.068) |
| Ratio of core | 0.216** | 0.184** | 0.113 | 0.457** |
|  | (0.087) | (0.082) | (0.096) | (0.206) |
| Number of countries | -0.032*** | -0.028*** | -0.024*** | -0.038*** |
|  | (0.006) | (0.006) | (0.007) | (0.014) |
| N | 4,011 | 4,011 | 3,368 | 1,354 |
| R2 | 0.113 | 0.225 | 0.475 | 0.170 |
| Adjusted R2 | 0.106 | 0.219 | 0.327 | 0.151 |
| *Note:* | *p<0.1; **p<0.05; ***p<0.01 | | | |

Predicting Creativity with Bonding. Table shows key variables and main controls (except year and platform dummies). Model 1) Baseline Model with standardized variables Model 2) Developer firms Random-Effects 3) Developer firms with Fixed-effects (as dummies) 4) Developer firm level aggregated models

**Table S6.**

|  | Distinctiveness | | | |
| --- | --- | --- | --- | --- |
|  | *OLS Models* | | | |
|  | Std rob SE | Dev firm RE | Dev firm FE dummies | Dev firm level std |
|  | (1) | (2) | (3) | (4) |
| Diversity | 0.033 | 0.027 | 0.012 | 0.060 |
|  | (0.026) | (0.026) | (0.029) | (0.048) |
| Incorporating | -0.073* | -0.069* | -0.052 | -0.091 |
|  | (0.038) | (0.039) | (0.042) | (0.073) |
| Diversity: Incorporating | 0.038** | 0.033** | 0.020 | 0.043* |
|  | (0.015) | (0.016) | (0.016) | (0.025) |
| Team Size | -0.001*** | -0.001*** | -0.001*** | -0.001** |
|  | (0.0002) | (0.0002) | (0.0003) | (0.0004) |
| Newbies ratio | 0.160 | 0.146 | 0.158 | 0.094 |
|  | (0.115) | (0.113) | (0.133) | (0.242) |
| Games tenure | 0.037 | 0.008 | 0.009 | 0.019 |
|  | (0.023) | (0.024) | (0.033) | (0.044) |
| Star developer | 0.114 | 0.293 | 0.328 | -0.358 |
|  | (0.312) | (0.381) | (0.309) | (0.245) |
| Single-firm production | 0.050 | 0.006 | -0.008 | -0.019 |
|  | (0.034) | (0.038) | (0.052) | (0.069) |
| Ratio of core | 0.186 | 0.182* | 0.153 | 0.398 |
|  | (0.122) | (0.109) | (0.135) | (0.291) |
| Number of countries | -0.033*** | -0.029*** | -0.024*** | -0.042*** |
|  | (0.006) | (0.006) | (0.007) | (0.014) |
| N | 4,011 | 4,011 | 3,368 | 1,354 |
| R2 | 0.111 | 0.224 | 0.474 | 0.159 |
| Adjusted R2 | 0.104 | 0.218 | 0.326 | 0.139 |
| *Note:* | *p<0.1; **p<0.05; ***p<0.01 | | | |

Predicting Creativity with Incorporating. Table shows key variables and main controls (except year and platform dummies). Model 1) Baseline Model with standardized variables Model 2) Developer firms Random-Effects 3) Developer firms with Fixed-effects (as dummies) 4) Developer firm level aggregated models.

**Table S7.**

|  | Distinctiveness | | | |
| --- | --- | --- | --- | --- |
|  | *OLS Models* | | | |
|  | Std rob SE | Dev firm RE | Dev firm FE dummies | Dev firm level std |
|  | (1) | (2) | (3) | (4) |
| Diversity | 0.040* | 0.033 | 0.032 | 0.043 |
|  | (0.021) | (0.022) | (0.025) | (0.038) |
| Combined Inclusion | -0.115** | -0.137** | -0.136** | -0.173* |
|  | (0.051) | (0.054) | (0.061) | (0.097) |
| Diversity: Combined Inclusion | 0.048*** | 0.049*** | 0.032* | 0.073*** |
|  | (0.016) | (0.017) | (0.019) | (0.028) |
| Team Size | -0.001*** | -0.001*** | -0.001*** | -0.001** |
|  | (0.0002) | (0.0002) | (0.0003) | (0.0004) |
| Newbies ratio | 0.158 | 0.149 | 0.179 | 0.082 |
|  | (0.115) | (0.114) | (0.134) | (0.238) |
| Games tenure | 0.038* | 0.009 | 0.008 | 0.025 |
|  | (0.023) | (0.024) | (0.033) | (0.044) |
| Star developer | 0.135 | 0.305 | 0.340 | -0.349 |
|  | (0.310) | (0.382) | (0.306) | (0.239) |
| Single-firm production | 0.050 | 0.006 | -0.003 | -0.021 |
|  | (0.034) | (0.038) | (0.052) | (0.069) |
| Ratio of core | 0.200** | 0.210** | 0.230** | 0.384 |
|  | (0.100) | (0.096) | (0.114) | (0.235) |
| Number of countries | -0.033*** | -0.029*** | -0.024*** | -0.040*** |
|  | (0.006) | (0.005) | (0.007) | (0.014) |
| N | 4,011 | 4,011 | 3,368 | 1,354 |
| R2 | 0.112 | 0.225 | 0.475 | 0.165 |
| Adjusted R2 | 0.105 | 0.219 | 0.327 | 0.146 |
| *Note:* | *p<0.1; **p<0.05; ***p<0.0 | | | |

Predicting Creativity with Combined Inclusion. Table shows key variables and main controls (except year and platform dummies). Model 1) Baseline Model with standardized variables Model 2) Developer firms Random-Effects 3) Developer firms with Fixed-effects (as dummies) 4) Developer firm level aggregated models

**Table S8.**

|  | Global Annual Sales (log) | | |
| --- | --- | --- | --- |
|  | OLS Models | | |
|  | (1) | (2) | (3) |
| Review Score | 0.174*** | 0.158*** | 0.099* |
|  | (0.050) | (0.050) | (0.052) |
| Diversity |  | -0.029 | 0.162 |
|  |  | (0.277) | (0.277) |
| Combined Inclusion |  | -0.009* | -0.013** |
|  |  | (0.005) | (0.005) |
| Diversity:Combined Inclusion |  | 0.014 | 0.023 |
|  |  | (0.016) | (0.016) |
| Team Size |  |  | 0.001*** |
|  |  |  | (0.0002) |
| Newbies ratio |  |  | 0.412*** |
|  |  |  | (0.158) |
| Games tenure |  |  | 0.128*** |
|  |  |  | (0.029) |
| Star developer |  |  | 0.110 |
|  |  |  | (0.325) |
| Single-firm production |  |  | 0.226*** |
|  |  |  | (0.042) |
| Ratio of core |  |  | 0.361*** |
|  |  |  | (0.134) |
| Number of countries |  |  | 0.010 |
|  |  |  | (0.007) |
| Constant | 4.004*** | 4.081*** | 3.524*** |
|  | (0.045) | (0.078) | (0.180) |
| Controls added | No | No | Yes |
| Observations | 1,484 | 1,484 | 1,484 |
| R2 | 0.008 | 0.014 | 0.119 |
| Adjusted R2 | 0.007 | 0.012 | 0.099 |
| Note: | *p<0.1; **p<0.05; ***p<0.01 | | |

Predicting Annual Sales with Review Score, Combined Inclusion and Diversity. Table shows key variables and main controls (except year and platform dummies). Model 1) Baseline Model only with Review Score Model 2) Baseline Model without controls 3) Full model with controls.

**Table S9.**

|  | Review Score | | |
| --- | --- | --- | --- |
|  | *Heckman* | | *OLS* |
|  | Selection | Outcome | Ols |
|  | 1 | 2 | 3 |
| Diversity | -2.041*** |  |  |
|  | (0.290) |  |  |
| Distinctiveness |  | 0.974*** | 0.838*** |
|  |  | (0.133) | (0.135) |
| Diversity:  Combined Inclusion | | -0.012 | -0.036*** |
|  |  | (0.012) | (0.012) |
| Team Size | 0.008*** | 0.0003** | 0.001*** |
|  | (0.001) | (0.0001) | (0.0001) |
| Games tenure |  | 0.021** | 0.024** |
|  |  | (0.010) | (0.010) |
| Star developer | 0.820 | 0.118 | 0.208 |
|  | (0.590) | (0.174) | (0.164) |
| Number of countries | 0.284*** |  |  |
|  | (0.019) |  |  |
| Single-firm production |  | 0.134*** | 0.120*** |
|  |  | (0.020) | (0.020) |
| Ratio of core |  | 0.188*** | 0.201*** |
|  |  | (0.057) | (0.059) |
| Controls added | No | No | No |
| Observations | 4,011 | 4,011 | 2,677 |
| R2 | 0.119 | 0.119 | 0.095 |
| Adjusted R2 | 0.111 | 0.111 | 0.088 |
| rho | -0.633 | -0.633 |  |
| Inverse Mills Ratio | -0.312*** (0.038) | -0.312*** (0.038) | |
| *Note:* | *p<0.1; **p<0.05; ***p<0.0 | | |

Predicting Game Review Score, with Heckman outcome model and OLS model. Table shows key variables and main controls (except year and platform dummies).

**Table S10.**

| Kotaku | | |
| --- | --- | --- |
| Position | Name | Gender |
| editor-in-chief | Stephen Totilo | Male |
| deputy editor | Maddy Myers | Female |
| editor-at-large | Riley MacLeod | Male |
| news editor | Jason Schreier | Male |
| features editor | Chris Kohler | Male |
| senior editor | Natalie Degraffinried | Female |
| senior writer (nights) | Brian Ashcraft | Male |
| senior writer (nights) | Luke Plunkett | Male |
| senior reporter | Michael Fahey | Male |
| senior reporter | Nathan Grayson | Male |
| senior writer | Heather Alexandra | Female |
| staff writer | Ethan Gach | Male |
| staff writer | Ari Notis | Male |
| staff writer | Ian Walker | Male |
| weekend editor | Zack Zwiezen | Male |
| senior video producer | Chris Person | Male |
| video producer | Paul Tamayo | Male |
| contributor | GB Burford | Unknown |
| contributor | Kevin Wong | Male |
| contributor | Joshua Calixto | Male |
| contributor | S.E. Doster | Unknown |
| contributor | Lee Yancy | Unknown |
| contributor | Kate Gray | Female |
| contributor | Harris O’Malley | Male |
| contributor | Kirk Hamilton | Male |
| art director | Jim Cooke | Male |
| staff illustrator | Angelica Alzona | Female |
| staff illustrator | Chelsea Beck | Female |
| staff illustrator | Elena Scotti | Female |

List of publicly available employees including game reviewers at Kotaku (https://kotaku.com/)

**Table S11.**

| Gaminformer | | |
| --- | --- | --- |
| Position | Name | Gender |
| editor-in-chief | Andy McNamara | Male |
| executive editor | Andrew Reine | Male |
| senior reviews editor | Joe Jubel | Male |
| senior previews editor | Matt Miller | Male |
| digital editor | Brian Shea | Male |
| pc editor | Daniel Tack | Male |
| features editor | Kimberley Wallace | Female |
| senior editor | Matthew Kato | Male |
| senior editor | Jeff Cork | Male |
| senior editor | Ben Reeves | Male |
| video producer | Leo Vader | Male |
| video editor | Alex Stadnik | Male |
| advertising manager | Janey Stringer | Female |
| marketing coordinator | Rachel Castle | Female |
| circulation services | Ted Katzung | Male |
| fulfillment specialist | Michelle Biros | Female |
| office manager | Sarah Hansen | Female |
| creative director | Jeff Akervik | Male |
| senior production director | Curtis Fung | Male |
| senior graphic designer | Laleh Tobin | Male |
| graphic designer | Jen Vinson | Female |
| web designer/programmer | Margaret Andrews | Female |
| web designer/programmer | Kristin Williams | Female |
| software engineer | Shawn Gilligan | Male |

List of publicly available employees including game reviewers at Gaminformer (<https://www.gameinformer.com/>)

**Table S12.**

| Eurogamer | | |
| --- | --- | --- |
| Position | Name | Gender |
| editor | Oli Welsh | Male |
| deputy editor | Wesley Yin-Poole | Male |
| feature and reviews editor | Martin Robinson | Male |
| news editor | Tom Phillips | Male |
| features editor | Christian Donlan | Male |
| guides editor | Matthew Reynolds | Male |
| senior staff writer | Robert Purchese | Male |
| staff writer | Chris Tapsell | Male |
| reporter | Matt Wales | Male |
| reporter | Emma Kent | Female |
| video team | Ian Higton | Male |
| video team | Johnny Chiodini | Male |
| video team | Aoife Wilson | Female |
| technology editor, digital foundry | Richard Leadbetter | Male |
| senior staff writer, digital foundry | Tom Morgan | Male |
| staff writer, digital foundry | John Linneman | Male |
| audience development director | Jon Hicks | Male |

List of publicly available employees including game reviewers at Eurgamer (https://www.eurogamer.net/reviews)

Data S1. (available online)

Csv file used in analysis with all calculated variables on game level available here: <https://github.com/velf/moby_data>

Code S1. (available online)

Codebase used in analysis available here: <https://github.com/velf/moby_data>
